# Supplementary material for: Antioxidants Protect against Arsenic Induced Mitochondrial Cardio-Toxicity
Source: PubMed Central journal article supplement (PMC5750566; doi:10.3390/toxics5040038), 2017-12-05
Supplement: toxics-05-00038-s001.pdf [file toxics-05-00038-s001.pdf]

# Supplementary Materials: Antioxidants Protect against Arsenic Induced Mitochondrial Cardio-Toxicity

Clare Pace, Ruben Dagda and Jeff Angermann

Table S1. Study Quality

|     | Criterion                                                             | Yes (n) | No (n) | Yes % | Average (SD) |
|-----|-----------------------------------------------------------------------|---------|--------|-------|--------------|
| 1.  | Was the study purpose clearly stated?                                 | 25      | 0      | 100%  | -            |
| 2.  | Number of technical replicates ( <i>in vitro</i> )                    | -       | -      | -     | 5.8 (1.6)    |
| 3.  | Number of endpoints assayed                                           | -       | -      | -     | 14.6 (9.6)   |
| 4.  | Were source and type of cells/animals listed?                         | 23      | 2      | 92%   |              |
| 5.  | What is the number of experimental groups?                            | -       | -      | -     | 5.8 (2.2)    |
| 6.  | Did study specify the number of animals per group? ( <i>in vivo</i> ) | 24      | 1      | 96%   | 6.7 (1.6)    |
| 7.  | Was gender of animals specified? ( <i>in vivo</i> )                   | 25      | 0      | 100%  | -            |
| 8.  | Were animals randomly assigned to experimental groups?                | 13      | 6      | 68.4% | -            |
| 9.  | Was a power analysis performed?                                       | 0       | 24     | 0%    | -            |
|     | Was variability assessed:                                             |         |        |       |              |
| 10. | Between subjects?                                                     | 25      | 0      | 100%  | -            |
|     | Within subjects?                                                      | 0       | 24     | 0%    | -            |
| 11. | Was statistical method fully reported?                                | 22      | 3      | 88%   | -            |
| 12. | Was statistical method appropriate?                                   | 20      | 2      | 91.3% | -            |
| 13. | Was numerical data reported?                                          | 18      | 7      | 72%   | -            |
| 14. | Were effect sizes reported?                                           | 0       | 25     | 0%    | -            |
|     | What statistics were reported for primary outcomes?                   |         |        |       |              |
| 15. | Mean(SE)                                                              | 11      | 14     | 44%   | -            |
|     | Mean(SEM)                                                             | 14      | 11     | 56%   | -            |
| 16. | Was funding source reported?                                          | 17      | 8      | 68%   | -            |
| 17. | Average number of citations/article                                   | -       | -      | -     | 12.1 (20.5)  |
| 18. | H Index                                                               | -       | -      | -     | 86.8 (50.8)  |
